# Supplementary material for: 3D time-dependent wave-packet approach in hyperspherical coordinates for the H + O2 reaction on the CHIPR and DMBE IV potential energy surfaces
Source: Royal Society of Chemistry journal article supplement (doi:10.1039/c7cp06254k), 2017-11-28
Supplement: c7cp06254k1.pdf [file c7cp06254k1.pdf]

# 3D Time-Dependent Wave-Packet Approach in Hyperspherical Coordinates for the H+O<sub>2</sub> Reaction on the CHIPR and DMBE IV Potential Energy Surfaces

Sandip Ghosh<sup>a</sup>, Rahul Sharma<sup>b</sup> and Satrajit Adhikari<sup>a\*</sup> and António J. C. Varandas<sup>c†</sup>

<sup>a</sup>Department of Physical Chemistry, Indian Association for the Cultivation of Science  
2A & 2B Raja S. C. Mullick Road, Jadavpur, Kolkata-700032, West Bengal, India

<sup>b</sup>St. Xavier's College, 30 Mother Teresa Sarani, Kolkata-700016, West Bengal, India

<sup>c</sup>Departamento de Química, and Centro de Química, Universidade de Coimbra  
3004-535 Coimbra, Portugal

November 18, 2017

## Supplementary Information

---

\*Corresponding author. e-mail: pcsa@iacs.res.in

†Corresponding author. e-mail: varandas@uc.pt

Figure 1 depicts rotationally resolved state-to-state reaction probability at a specific final vibrational state ( $v' = 0$ ) of OH diatom for the title reaction starting from the initial rovibrational state  $v = 0, j = 1$  of the O<sub>2</sub> diatom at four different collision energies, *viz.*,  $E_c = 0.5$  eV, 1.0 eV, 1.5 eV and 2.0 eV. One can clearly see that the reaction probabilities are very small at  $E_c = 0.5$  eV, which essentially is the signature of existence of the threshold value for opening of the product channel. Moreover, as the collision energy increases, the state-to-state reaction probabilities also gradually increases, which is consistent with the feature of the total reaction probability profile [see Fig. 1 of the main text]. The general feature of the profiles is that all of them start with some moderate value, goes through some maxima and then gradually diminishes at higher  $j$ 's. Also, it is quite evident that the reaction probabilities are well converged within the collision energies of our consideration. As expected, the convergence profiles of reaction probabilities becomes gradually right shifted with the increase of collision energy indicating the requirement of more  $j$ 's at higher collision energy. On the other hand, the convergence profiles of rotationally resolved reaction probabilities at  $v' = 1$  are shown in Figure 2, where the trends of the profiles at those four collision energies are similar to that of Figure 1, except the fact that the profiles converges faster with respect to  $j$ '. Moreover, the magnitudes of the reaction probabilities at most of the collision energies are lesser as compared to the  $v' = 0$  case.

On the other hand, Figure 3 displays the rotationally summed vibrationally resolved reaction probabilities at four different collision energies,  $E_c = 0.5$  eV, 1.0 eV, 1.5 eV and 2.0 eV for the title reaction starting from the

initial rovibrational state  $v = 0, j = 1$  of the  $O_2$  diatom. Here, in all the energies, the profiles generally starts with a higher value and then gradually diminishes as  $v'$  increases. Moreover, as the collision energy increase, the  $v'$  required for convergence also increases. One can clearly see that the profiles are well converged within the range of  $v'$  ( $= 0 - 10$ ) considered in our calculation.

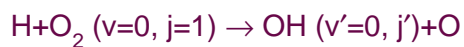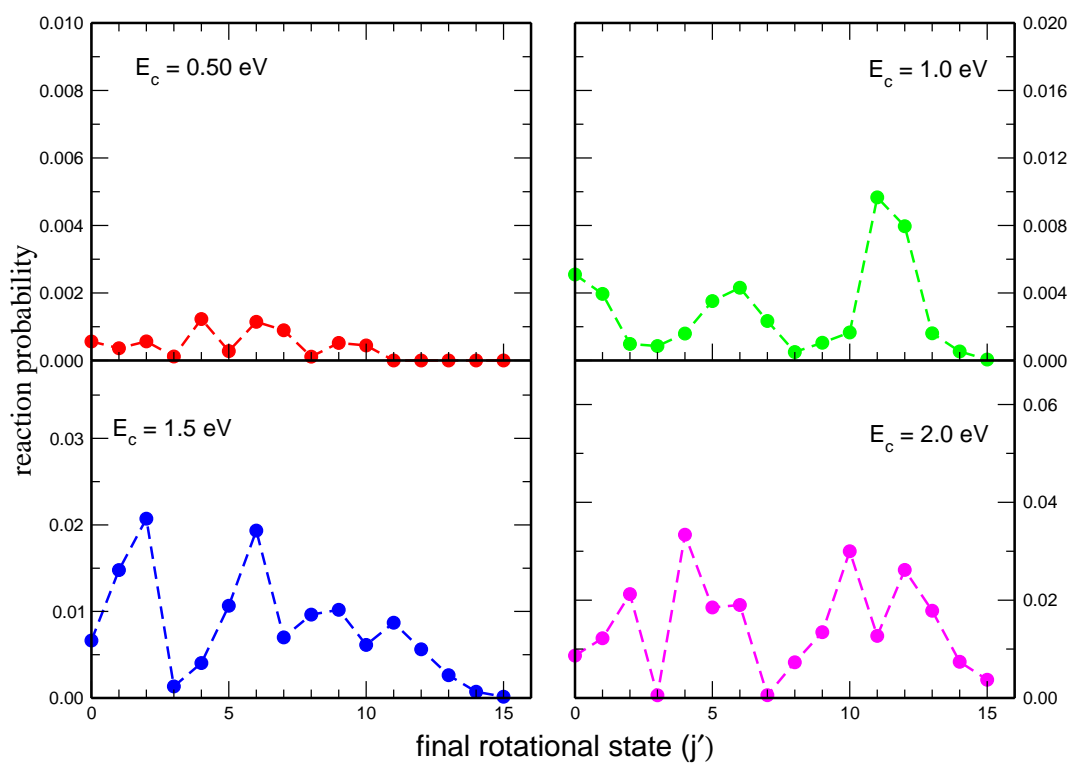

Figure 1: Rotationally resolved state-to-state reaction probability for  $\text{H} + \text{O}_2 (v=0, j=1) \rightarrow \text{OH} (v' = 0) + \text{O}$  reaction as a function of various final rotational states, *viz.*,  $j' = 0 - 15$  at four different collision energies (0.5 eV, 1.0 eV, 1.5 eV and 2.0 eV).

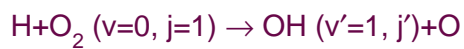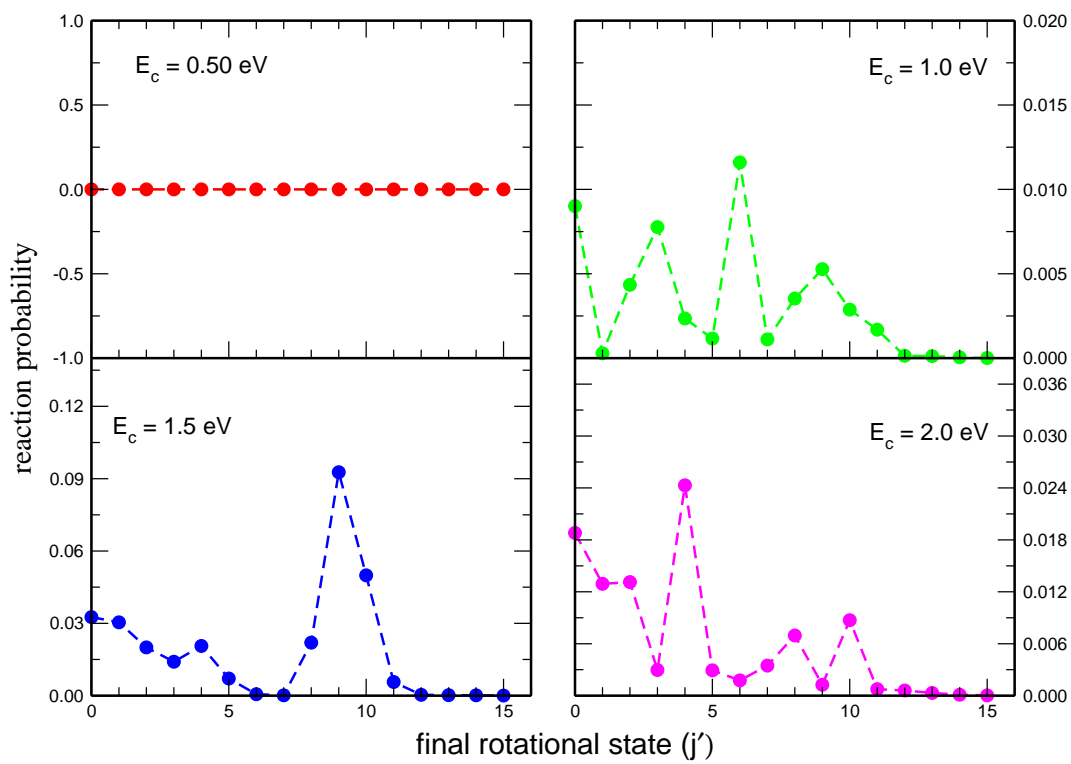

Figure 2: Same as Fig. 1, but for  $v' = 1$ .

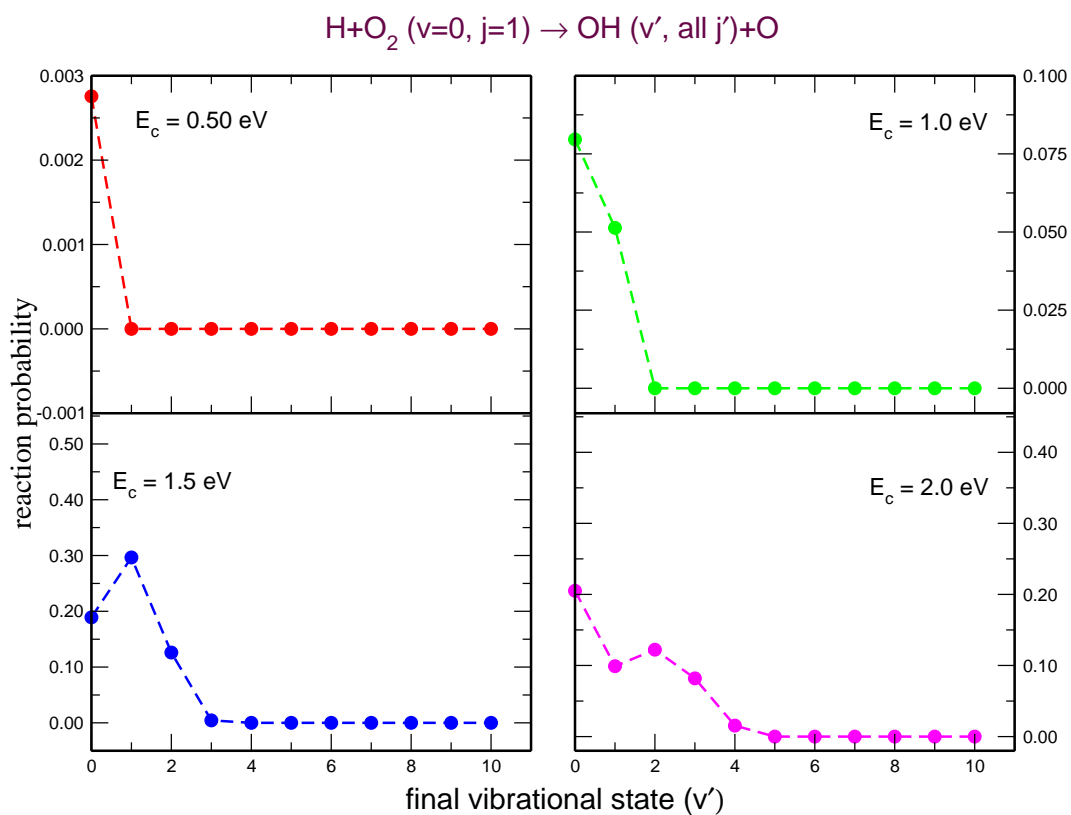

Figure 3: State-to-state reaction probability for  $\text{H} + \text{O}_2 (v=0, j=1) \rightarrow \text{OH} (v', j') + \text{O}$  reaction at various final vibrational states, *viz.*,  $v' = 0 - 10$ .

Table 1: Data for initialization, projection, and absorbing potential discussed in the text: H +O<sub>2</sub> ( $v = 0, j = 1; J = 0$ )

|                                                         |           |                                   |
|---------------------------------------------------------|-----------|-----------------------------------|
| <b>Grid size:</b>                                       |           |                                   |
| $N_\rho$                                                |           | 256                               |
| $N_\theta$                                              |           | 64                                |
| $N_\phi$                                                |           | 128                               |
| $(\rho_{min}, \rho_{max})/\text{\AA}$                   |           | (1.0, 12.0)                       |
| <b>Translational wave packet:</b>                       |           |                                   |
| $R_0/\text{\AA}$                                        |           | 6.50 ( $\sim 7.55$ ) <sup>a</sup> |
| $\sigma/\text{\AA}$                                     |           | 0.21                              |
| $k_0$ ( $\text{\AA}^{-1}$ )                             |           | 29.00772                          |
| <b>Initial state:</b>                                   |           |                                   |
| $E_{vj}$ (eV)                                           |           | 0.097909                          |
| <b>Propagation:</b>                                     |           |                                   |
| $\Delta t$ ( $10^{-16}$ s)                              |           | 0.50                              |
| Magnitude of the five last Lanczos vectors <sup>b</sup> |           | $10^{-8} - 10^{-7}$               |
| <b>Absorbing potential:</b>                             |           |                                   |
| $V_{opt}/\text{eV}$                                     |           | 0.163                             |
| $\rho_I$ ( $\text{\AA}$ )                               |           | 10.5                              |
| Range of the absorbing potential ( $\text{\AA}$ )       |           | 10.5 - 12.0                       |
| <b>Projection:</b>                                      |           |                                   |
| $R^*$ ( $\text{\AA}$ )                                  |           | 3.5 ( $\sim 4.45$ ) <sup>a</sup>  |
| vib. states                                             |           | $v' = 0, \dots, 10$               |
| rot. states                                             |           | $j' = 0, \dots, 15$               |
| <b>Rotational Constants of O...OH Complex:</b>          |           |                                   |
|                                                         | CHIPR PES | DMBE IV PES                       |
| $A^\ddagger$ ( $\text{cm}^{-1}$ )                       | 35.51     | 44.95                             |
| $B^\ddagger$ ( $\text{cm}^{-1}$ )                       | 0.249     | 0.289                             |
| <b>Maximum Value of Total Angular Momentum:</b>         |           |                                   |
| $J_{max}$                                               |           | 63                                |

<sup>a</sup> The transformed values of various parameters in  $\rho$  - space are shown in the parenthesis.

<sup>b</sup> All vectors are normalized.

Table 2: Total Reaction probability for  $v = 0, j=1$  (CHIPR PES)

| Energy (eV) | Reaction Probability |
|-------------|----------------------|
| 0.220627    | 0.003421             |
| 0.243345    | 0.002732             |
| 0.266063    | 0.002769             |
| 0.288781    | 0.002850             |
| 0.311499    | 0.002517             |
| 0.334217    | 0.002356             |
| 0.356935    | 0.002504             |
| 0.379652    | 0.002607             |
| 0.402370    | 0.002655             |
| 0.425088    | 0.002335             |
| 0.447806    | 0.002538             |
| 0.470524    | 0.002937             |
| 0.493242    | 0.002807             |
| 0.515960    | 0.002798             |
| 0.538678    | 0.003246             |
| 0.561396    | 0.003260             |
| 0.584114    | 0.004379             |
| 0.606831    | 0.004339             |
| 0.629549    | 0.006088             |
| 0.652267    | 0.004494             |
| 0.674985    | 0.017951             |
| 0.697703    | 0.009258             |
| 0.720421    | 0.025010             |
| 0.743139    | 0.021053             |
| 0.765857    | 0.037028             |
| 0.788575    | 0.032204             |
| 0.811293    | 0.039335             |
| 0.834011    | 0.040992             |
| 0.856728    | 0.053218             |
| 0.879446    | 0.066097             |
| 0.902164    | 0.112607             |
| 0.924882    | 0.090403             |
| 0.947600    | 0.087908             |
| 0.970318    | 0.095481             |
| 0.993036    | 0.150086             |
| 1.015754    | 0.110880             |
| 1.038472    | 0.187544             |
| 1.061190    | 0.141219             |
| 1.083907    | 0.178613             |
| 1.106625    | 0.111308             |
| 1.129343    | 0.144310             |
| 1.152061    | 0.167947             |
| 1.174779    | 0.149420             |
| 1.197497    | 0.207480             |
| 1.220215    | 0.189779             |
| 1.242933    | 0.178050             |
| 1.265651    | 0.221402             |
| 1.288369    | 0.256467             |
| 1.311087    | 0.224742             |
| 1.333804    | 0.300127             |
| 1.356522    | 0.231329             |
| 1.379240    | 0.314394             |
| 1.401958    | 0.216867             |
| 1.424676    | 0.248595             |
| 1.447394    | 0.474079             |
| 1.470112    | 0.413832             |



Table 3: ... Continued from Previous Page

| Energy (eV) | Reaction Probability |
|-------------|----------------------|
| 1.492830    | 0.525428             |
| 1.515548    | 0.422228             |
| 1.538266    | 0.589298             |
| 1.560983    | 0.431309             |
| 1.583701    | 0.478639             |
| 1.606419    | 0.654052             |
| 1.629137    | 0.595277             |
| 1.651855    | 0.518751             |
| 1.674573    | 0.564686             |
| 1.697291    | 0.713160             |
| 1.720009    | 0.479785             |
| 1.742727    | 0.563699             |
| 1.765445    | 0.521046             |
| 1.788163    | 0.551727             |
| 1.810880    | 0.506807             |
| 1.833598    | 0.659730             |
| 1.856316    | 0.578885             |
| 1.879034    | 0.391747             |
| 1.901752    | 0.536330             |
| 1.924470    | 0.486824             |
| 1.947188    | 0.533286             |
| 1.969906    | 0.579722             |
| 1.992624    | 0.674487             |
| 2.015342    | 0.529813             |
| 2.038059    | 0.557522             |
| 2.060777    | 0.633528             |
| 2.083495    | 0.563234             |
| 2.106213    | 0.625224             |
| 2.128931    | 0.507851             |
| 2.151649    | 0.556557             |
| 2.174367    | 0.622278             |
| 2.197085    | 0.390074             |
| 2.219803    | 0.420233             |
| 2.242521    | 0.529038             |
| 2.265239    | 0.581084             |
| 2.287956    | 0.546999             |
| 2.310674    | 0.663748             |
| 2.333392    | 0.561514             |
| 2.356110    | 0.536913             |
| 2.378828    | 0.616523             |
| 2.401546    | 0.574050             |
| 2.424264    | 0.496524             |
| 2.446982    | 0.668281             |
| 2.469700    | 0.444631             |
| 2.492418    | 0.461760             |
| 2.515135    | 0.569897             |

Table 4: Total Reaction probability for  $v = 0, j=3$  (CHIPR PES)

| Energy (eV) | Reaction Probability |
|-------------|----------------------|
| 0.224917    | 0.005380             |
| 0.250159    | 0.004602             |
| 0.275401    | 0.004885             |
| 0.300643    | 0.004952             |
| 0.325885    | 0.004480             |
| 0.351127    | 0.004295             |
| 0.376369    | 0.004094             |
| 0.401611    | 0.004803             |
| 0.426854    | 0.005011             |
| 0.452096    | 0.004907             |
| 0.477338    | 0.004100             |
| 0.502580    | 0.005485             |
| 0.527822    | 0.006289             |
| 0.553064    | 0.009885             |
| 0.578306    | 0.010073             |
| 0.603548    | 0.009635             |
| 0.628790    | 0.014902             |
| 0.654033    | 0.023740             |
| 0.679275    | 0.027995             |
| 0.704517    | 0.037417             |
| 0.729759    | 0.034745             |
| 0.755001    | 0.037173             |
| 0.780243    | 0.141791             |
| 0.805485    | 0.110836             |
| 0.830727    | 0.110866             |
| 0.855970    | 0.137720             |
| 0.881212    | 0.224619             |
| 0.906454    | 0.254730             |
| 0.931696    | 0.305317             |
| 0.956938    | 0.196339             |
| 0.982180    | 0.344382             |
| 1.007422    | 0.235179             |
| 1.032664    | 0.238182             |
| 1.057906    | 0.330669             |
| 1.083149    | 0.293236             |
| 1.108391    | 0.281391             |
| 1.133633    | 0.413137             |
| 1.158875    | 0.290966             |
| 1.184117    | 0.299269             |
| 1.209359    | 0.286683             |
| 1.234601    | 0.303439             |
| 1.259843    | 0.311126             |
| 1.285085    | 0.358701             |
| 1.310328    | 0.421693             |
| 1.335570    | 0.413239             |
| 1.360812    | 0.502012             |
| 1.386054    | 0.379359             |
| 1.411296    | 0.535818             |
| 1.436538    | 0.581942             |
| 1.461780    | 0.520137             |
| 1.487022    | 0.504256             |

Table 5: ... Continued from Previous Page

| Energy (eV) | Reaction Probability |
|-------------|----------------------|
| 1.512265    | 0.610502             |
| 1.537507    | 0.588251             |
| 1.562749    | 0.543885             |
| 1.587991    | 0.525135             |
| 1.613233    | 0.640513             |
| 1.638475    | 0.572324             |
| 1.663717    | 0.505374             |
| 1.688959    | 0.467029             |
| 1.714201    | 0.588213             |
| 1.739444    | 0.674327             |
| 1.764686    | 0.495004             |
| 1.789928    | 0.529519             |
| 1.815170    | 0.547480             |
| 1.840412    | 0.569609             |
| 1.865654    | 0.491385             |
| 1.890896    | 0.452366             |
| 1.916138    | 0.626578             |
| 1.941381    | 0.630174             |
| 1.966623    | 0.595183             |
| 1.991865    | 0.635300             |
| 2.017107    | 0.553093             |
| 2.042349    | 0.431248             |
| 2.067591    | 0.593736             |
| 2.092833    | 0.567303             |
| 2.118075    | 0.446837             |
| 2.143317    | 0.524595             |
| 2.168560    | 0.578799             |
| 2.193802    | 0.506684             |
| 2.219044    | 0.561004             |
| 2.244286    | 0.620867             |
| 2.269528    | 0.641567             |
| 2.294770    | 0.657940             |
| 2.320012    | 0.636043             |
| 2.345254    | 0.450395             |
| 2.370496    | 0.611707             |
| 2.395739    | 0.509784             |
| 2.420981    | 0.576434             |
| 2.446223    | 0.496902             |
| 2.471465    | 0.484001             |
| 2.496707    | 0.504464             |

Table 6: Total Reaction probability for  $v = 0, j=5$  (CHIPR PES)

| Energy (eV) | Reaction Probability |
|-------------|----------------------|
| 0.228094    | 0.003790             |
| 0.253336    | 0.002932             |
| 0.278578    | 0.002302             |
| 0.303820    | 0.002153             |
| 0.329062    | 0.002425             |
| 0.354304    | 0.003125             |
| 0.379547    | 0.002561             |
| 0.404789    | 0.002292             |
| 0.430031    | 0.002175             |
| 0.455273    | 0.002782             |
| 0.480515    | 0.003697             |
| 0.505757    | 0.004322             |
| 0.530999    | 0.003379             |
| 0.556241    | 0.008636             |
| 0.581483    | 0.005630             |
| 0.606726    | 0.011876             |
| 0.631968    | 0.012925             |
| 0.657210    | 0.011285             |
| 0.682452    | 0.036049             |
| 0.707694    | 0.056880             |
| 0.732936    | 0.040097             |
| 0.758178    | 0.057163             |
| 0.783420    | 0.164594             |
| 0.808662    | 0.117967             |
| 0.833905    | 0.100239             |
| 0.859147    | 0.148588             |
| 0.884389    | 0.200845             |
| 0.909631    | 0.213335             |
| 0.934873    | 0.250530             |
| 0.960115    | 0.301105             |
| 0.985357    | 0.360892             |
| 1.010599    | 0.316824             |
| 1.035842    | 0.292361             |
| 1.061084    | 0.367923             |
| 1.086326    | 0.197399             |
| 1.111568    | 0.247272             |
| 1.136810    | 0.418993             |
| 1.162052    | 0.246986             |
| 1.187294    | 0.253475             |
| 1.212536    | 0.187912             |
| 1.237778    | 0.301336             |
| 1.263021    | 0.376667             |
| 1.288263    | 0.306798             |
| 1.313505    | 0.437486             |
| 1.338747    | 0.522178             |
| 1.363989    | 0.400851             |
| 1.389231    | 0.344052             |
| 1.414473    | 0.391821             |
| 1.439715    | 0.408819             |
| 1.464958    | 0.418497             |
| 1.490200    | 0.529230             |

Table 7: ... Continued from Previous Page

| Energy (eV) | Reaction Probability |
|-------------|----------------------|
| 1.515442    | 0.530049             |
| 1.540684    | 0.487142             |
| 1.565926    | 0.563504             |
| 1.591168    | 0.648602             |
| 1.616410    | 0.502908             |
| 1.641652    | 0.568023             |
| 1.666894    | 0.524843             |
| 1.692137    | 0.511415             |
| 1.717379    | 0.590392             |
| 1.742621    | 0.486760             |
| 1.767863    | 0.469515             |
| 1.793105    | 0.577594             |
| 1.818347    | 0.505570             |
| 1.843589    | 0.398083             |
| 1.868831    | 0.630875             |
| 1.894073    | 0.619600             |
| 1.919316    | 0.614237             |
| 1.944558    | 0.538844             |
| 1.969800    | 0.431511             |
| 1.995042    | 0.522727             |
| 2.020284    | 0.613494             |
| 2.045526    | 0.537484             |
| 2.070768    | 0.601203             |
| 2.096010    | 0.669721             |
| 2.121253    | 0.555113             |
| 2.146495    | 0.595664             |
| 2.171737    | 0.557277             |
| 2.196979    | 0.740813             |
| 2.222221    | 0.470775             |
| 2.247463    | 0.496791             |
| 2.272705    | 0.541005             |
| 2.297947    | 0.680766             |
| 2.323189    | 0.598753             |
| 2.348432    | 0.711364             |
| 2.373674    | 0.600533             |
| 2.398916    | 0.495306             |
| 2.424158    | 0.524109             |
| 2.449400    | 0.567219             |
| 2.474642    | 0.603702             |
| 2.499884    | 0.451579             |

Table 8: Total Reaction probability for  $v = 1, j=1$  (CHIPR PES)

| Energy (eV) | Reaction Probability |
|-------------|----------------------|
| 0.316706    | 0.017320             |
| 0.338162    | 0.014881             |
| 0.359618    | 0.015105             |
| 0.381074    | 0.014143             |
| 0.402529    | 0.013265             |
| 0.423985    | 0.013504             |
| 0.445441    | 0.012949             |
| 0.466897    | 0.012819             |
| 0.488353    | 0.013939             |
| 0.509808    | 0.017152             |
| 0.531264    | 0.014043             |
| 0.552720    | 0.013574             |
| 0.574176    | 0.033418             |
| 0.595632    | 0.042719             |
| 0.617087    | 0.026312             |
| 0.638543    | 0.068848             |
| 0.659999    | 0.050396             |
| 0.681455    | 0.101401             |
| 0.702911    | 0.172984             |
| 0.724366    | 0.243900             |
| 0.745822    | 0.265687             |
| 0.767278    | 0.243667             |
| 0.788734    | 0.240882             |
| 0.810190    | 0.442402             |
| 0.831645    | 0.236360             |
| 0.853101    | 0.387592             |
| 0.874557    | 0.534876             |
| 0.896013    | 0.348095             |
| 0.917469    | 0.201091             |
| 0.938924    | 0.343571             |
| 0.960380    | 0.402742             |
| 0.981836    | 0.539095             |
| 1.003292    | 0.528119             |
| 1.024748    | 0.680352             |
| 1.046203    | 0.444041             |
| 1.067659    | 0.513068             |
| 1.089115    | 0.266533             |
| 1.110571    | 0.276144             |
| 1.132027    | 0.486536             |
| 1.153482    | 0.471960             |
| 1.174938    | 0.533228             |
| 1.196394    | 0.554749             |
| 1.217850    | 0.624691             |
| 1.239306    | 0.375180             |
| 1.260761    | 0.663738             |
| 1.282217    | 0.443983             |
| 1.303673    | 0.265853             |
| 1.325129    | 0.426325             |
| 1.346585    | 0.414125             |
| 1.368040    | 0.518078             |
| 1.389496    | 0.650475             |
| 1.410952    | 0.607639             |
| 1.432408    | 0.658986             |
| 1.453864    | 0.727415             |
| 1.475319    | 0.504273             |
| 1.496775    | 0.486092             |

Table 9: ... Continued from Previous Page

| Energy (eV) | Reaction Probability |
|-------------|----------------------|
| 1.518231    | 0.468822             |
| 1.539687    | 0.692962             |
| 1.561142    | 0.694113             |
| 1.582598    | 0.647882             |
| 1.604054    | 0.651129             |
| 1.625510    | 0.625289             |
| 1.646966    | 0.714803             |
| 1.668421    | 0.572401             |
| 1.689877    | 0.653365             |
| 1.711333    | 0.592316             |
| 1.732789    | 0.683297             |
| 1.754245    | 0.572970             |
| 1.775700    | 0.664451             |
| 1.797156    | 0.630649             |
| 1.818612    | 0.443971             |
| 1.840068    | 0.537203             |
| 1.861524    | 0.534281             |
| 1.882979    | 0.614065             |
| 1.904435    | 0.486471             |
| 1.925891    | 0.681830             |
| 1.947347    | 0.519187             |
| 1.968803    | 0.612366             |
| 1.990258    | 0.576474             |
| 2.011714    | 0.604310             |
| 2.033170    | 0.643995             |
| 2.054626    | 0.583664             |
| 2.076082    | 0.518791             |
| 2.097537    | 0.655612             |
| 2.118993    | 0.686101             |
| 2.140449    | 0.626362             |
| 2.161905    | 0.631626             |
| 2.183361    | 0.669624             |
| 2.204816    | 0.646999             |
| 2.226272    | 0.480681             |
| 2.247728    | 0.562771             |
| 2.269184    | 0.527432             |
| 2.290640    | 0.584615             |
| 2.312095    | 0.596868             |
| 2.333551    | 0.586137             |
| 2.355007    | 0.580798             |
| 2.376463    | 0.546499             |
| 2.397919    | 0.433714             |
| 2.419374    | 0.440896             |
| 2.440830    | 0.641944             |
| 2.462286    | 0.681623             |
| 2.483742    | 0.576572             |
| 2.505198    | 0.588478             |

Table 10: Total Reaction probability for  $v = 1, j=3$  (CHIPR PES)

| Energy (eV) | Reaction Probability |
|-------------|----------------------|
| 0.314032    | 0.013110             |
| 0.335488    | 0.010729             |
| 0.356944    | 0.010702             |
| 0.378400    | 0.010286             |
| 0.399856    | 0.010265             |
| 0.421311    | 0.011394             |
| 0.442767    | 0.014160             |
| 0.464223    | 0.011896             |
| 0.485679    | 0.014369             |
| 0.507135    | 0.016271             |
| 0.528590    | 0.019915             |
| 0.550046    | 0.023182             |
| 0.571502    | 0.025375             |
| 0.592958    | 0.068632             |
| 0.614414    | 0.076469             |
| 0.635869    | 0.129866             |
| 0.657325    | 0.125433             |
| 0.678781    | 0.105020             |
| 0.700237    | 0.102805             |
| 0.721693    | 0.239506             |
| 0.743148    | 0.233460             |
| 0.764604    | 0.174995             |
| 0.786060    | 0.338036             |
| 0.807516    | 0.416916             |
| 0.828972    | 0.526600             |
| 0.850427    | 0.401831             |
| 0.871883    | 0.593744             |
| 0.893339    | 0.399431             |
| 0.914795    | 0.251893             |
| 0.936251    | 0.394391             |
| 0.957706    | 0.288407             |
| 0.979162    | 0.733375             |
| 1.000618    | 0.696021             |
| 1.022074    | 0.604027             |
| 1.043530    | 0.381073             |
| 1.064985    | 0.518137             |
| 1.086441    | 0.524381             |
| 1.107897    | 0.226508             |
| 1.129353    | 0.444270             |
| 1.150809    | 0.439214             |
| 1.172264    | 0.520969             |
| 1.193720    | 0.652227             |
| 1.215176    | 0.644802             |
| 1.236632    | 0.509394             |
| 1.258087    | 0.536717             |
| 1.279543    | 0.397392             |
| 1.300999    | 0.356888             |
| 1.322455    | 0.424331             |
| 1.343911    | 0.477449             |
| 1.365366    | 0.479981             |
| 1.386822    | 0.640628             |
| 1.408278    | 0.575943             |
| 1.429734    | 0.683464             |
| 1.451190    | 0.722093             |
| 1.472645    | 0.643901             |
| 1.494101    | 0.654120             |



Table 11: ... Continued from Previous Page

| Energy (eV) | Reaction Probability |
|-------------|----------------------|
| 1.515557    | 0.592225             |
| 1.537013    | 0.581106             |
| 1.558469    | 0.503629             |
| 1.579924    | 0.701478             |
| 1.601380    | 0.734262             |
| 1.622836    | 0.617154             |
| 1.644292    | 0.642017             |
| 1.665748    | 0.725097             |
| 1.687203    | 0.619983             |
| 1.708659    | 0.595005             |
| 1.730115    | 0.676373             |
| 1.751571    | 0.592672             |
| 1.773027    | 0.740266             |
| 1.794482    | 0.793557             |
| 1.815938    | 0.467207             |
| 1.837394    | 0.739449             |
| 1.858850    | 0.535662             |
| 1.880306    | 0.528983             |
| 1.901761    | 0.568009             |
| 1.923217    | 0.541456             |
| 1.944673    | 0.759007             |
| 1.966129    | 0.765194             |
| 1.987585    | 0.587281             |
| 2.009040    | 0.708082             |
| 2.030496    | 0.535093             |
| 2.051952    | 0.499310             |
| 2.073408    | 0.641366             |
| 2.094864    | 0.607005             |
| 2.116319    | 0.491410             |
| 2.137775    | 0.605102             |
| 2.159231    | 0.629301             |
| 2.180687    | 0.615302             |
| 2.202143    | 0.592927             |
| 2.223598    | 0.549147             |
| 2.245054    | 0.665107             |
| 2.266510    | 0.601420             |
| 2.287966    | 0.659043             |
| 2.309422    | 0.670799             |
| 2.330877    | 0.596863             |
| 2.352333    | 0.565162             |
| 2.373789    | 0.689166             |
| 2.395245    | 0.692957             |
| 2.416701    | 0.596904             |
| 2.438156    | 0.546699             |
| 2.459612    | 0.654300             |
| 2.481068    | 0.606368             |
| 2.502524    | 0.625463             |

Table 12: Total Reaction probability for  $v = 1, j=5$  (CHIPR PES)

| Energy (eV) | Reaction Probability |
|-------------|----------------------|
| 0.317170    | 0.010296             |
| 0.338626    | 0.008525             |
| 0.360082    | 0.008291             |
| 0.381538    | 0.008235             |
| 0.402994    | 0.008153             |
| 0.424449    | 0.008596             |
| 0.445905    | 0.009897             |
| 0.467361    | 0.009609             |
| 0.488817    | 0.009994             |
| 0.510273    | 0.016402             |
| 0.531728    | 0.012387             |
| 0.553184    | 0.024078             |
| 0.574640    | 0.023666             |
| 0.596096    | 0.070462             |
| 0.617552    | 0.073240             |
| 0.639007    | 0.150818             |
| 0.660463    | 0.152976             |
| 0.681919    | 0.119207             |
| 0.703375    | 0.146270             |
| 0.724831    | 0.330727             |
| 0.746286    | 0.258940             |
| 0.767742    | 0.158630             |
| 0.789198    | 0.430695             |
| 0.810654    | 0.504014             |
| 0.832110    | 0.586092             |
| 0.853565    | 0.474657             |
| 0.875021    | 0.682410             |
| 0.896477    | 0.458224             |
| 0.917933    | 0.289563             |
| 0.939389    | 0.422455             |
| 0.960844    | 0.307177             |
| 0.982300    | 0.747118             |
| 1.003756    | 0.656708             |
| 1.025212    | 0.688776             |
| 1.046668    | 0.466834             |
| 1.068123    | 0.568896             |
| 1.089579    | 0.621454             |
| 1.111035    | 0.287999             |
| 1.132491    | 0.405251             |
| 1.153947    | 0.419117             |
| 1.175402    | 0.501972             |
| 1.196858    | 0.676309             |
| 1.218314    | 0.644963             |
| 1.239770    | 0.611625             |
| 1.261226    | 0.491638             |
| 1.282681    | 0.457566             |
| 1.304137    | 0.302324             |
| 1.325593    | 0.427293             |
| 1.347049    | 0.408662             |
| 1.368505    | 0.470688             |
| 1.389960    | 0.668395             |
| 1.411416    | 0.589323             |
| 1.432872    | 0.792711             |
| 1.454328    | 0.640206             |
| 1.475784    | 0.675982             |
| 1.497239    | 0.565682             |

Table 13: ... Continued from Previous Page

| Energy (eV) | Reaction Probability |
|-------------|----------------------|
| 1.518695    | 0.683983             |
| 1.540151    | 0.755005             |
| 1.561607    | 0.678319             |
| 1.583063    | 0.669768             |
| 1.604518    | 0.648980             |
| 1.625974    | 0.529544             |
| 1.647430    | 0.619036             |
| 1.668886    | 0.779572             |
| 1.690342    | 0.558066             |
| 1.711797    | 0.609086             |
| 1.733253    | 0.677687             |
| 1.754709    | 0.542270             |
| 1.776165    | 0.665039             |
| 1.797621    | 0.568071             |
| 1.819076    | 0.573350             |
| 1.840532    | 0.470636             |
| 1.861988    | 0.479203             |
| 1.883444    | 0.656437             |
| 1.904900    | 0.425213             |
| 1.926355    | 0.644380             |
| 1.947811    | 0.670624             |
| 1.969267    | 0.657847             |
| 1.990723    | 0.484846             |
| 2.012179    | 0.603508             |
| 2.033634    | 0.751466             |
| 2.055090    | 0.575830             |
| 2.076546    | 0.565329             |
| 2.098002    | 0.567323             |
| 2.119458    | 0.666589             |
| 2.140913    | 0.568529             |
| 2.162369    | 0.794135             |
| 2.183825    | 0.637908             |
| 2.205281    | 0.693264             |
| 2.226737    | 0.589644             |
| 2.248192    | 0.675059             |
| 2.269648    | 0.565352             |
| 2.291104    | 0.727963             |
| 2.312560    | 0.567603             |
| 2.334016    | 0.620557             |
| 2.355471    | 0.632653             |
| 2.376927    | 0.662130             |
| 2.398383    | 0.619769             |
| 2.419839    | 0.536658             |
| 2.441295    | 0.620023             |
| 2.462750    | 0.677650             |
| 2.484206    | 0.587941             |
| 2.505662    | 0.559120             |

Table 14: Total Reaction probability for  $v = 2, j=1$  (CHIPR PES)

| Energy (eV) | Reaction Probability |
|-------------|----------------------|
| 0.029659    | 0.006301             |
| 0.054271    | 0.005133             |
| 0.078882    | 0.004796             |
| 0.103493    | 0.004656             |
| 0.128104    | 0.006578             |
| 0.152715    | 0.006289             |
| 0.177326    | 0.007192             |
| 0.201937    | 0.009207             |
| 0.226548    | 0.013872             |
| 0.251159    | 0.022253             |
| 0.275770    | 0.075264             |
| 0.300381    | 0.115132             |
| 0.324992    | 0.092947             |
| 0.349603    | 0.158443             |
| 0.374214    | 0.232026             |
| 0.398825    | 0.206235             |
| 0.423436    | 0.251192             |
| 0.448048    | 0.336983             |
| 0.472659    | 0.244851             |
| 0.497270    | 0.400487             |
| 0.521881    | 0.589493             |
| 0.546492    | 0.351811             |
| 0.571103    | 0.546304             |
| 0.595714    | 0.328771             |
| 0.620325    | 0.315042             |
| 0.644936    | 0.522593             |
| 0.669547    | 0.394276             |
| 0.694158    | 0.569020             |
| 0.718769    | 0.607668             |
| 0.743380    | 0.530963             |
| 0.767991    | 0.513318             |
| 0.792602    | 0.544052             |
| 0.817214    | 0.240603             |
| 0.841825    | 0.518578             |
| 0.866436    | 0.606395             |
| 0.891047    | 0.521224             |
| 0.915658    | 0.808657             |
| 0.940269    | 0.693044             |
| 0.964880    | 0.556956             |
| 0.989491    | 0.458303             |
| 1.014102    | 0.342333             |
| 1.038713    | 0.463169             |
| 1.063324    | 0.573250             |
| 1.087935    | 0.525672             |
| 1.112546    | 0.567242             |
| 1.137157    | 0.654282             |
| 1.161768    | 0.667442             |
| 1.186379    | 0.494515             |
| 1.210991    | 0.608660             |
| 1.235602    | 0.523111             |
| 1.260213    | 0.403838             |
| 1.284824    | 0.584618             |
| 1.309435    | 0.580970             |
| 1.334046    | 0.618147             |
| 1.358657    | 0.661174             |
| 1.383268    | 0.557205             |

Table 15: ... Continued from Previous Page

| Energy (eV) | Reaction Probability |
|-------------|----------------------|
| 1.407879    | 0.662400             |
| 1.432490    | 0.615822             |
| 1.457101    | 0.665487             |
| 1.481712    | 0.695122             |
| 1.506323    | 0.666939             |
| 1.530934    | 0.561452             |
| 1.555545    | 0.662212             |
| 1.580156    | 0.572088             |
| 1.604768    | 0.586000             |
| 1.629379    | 0.566172             |
| 1.653990    | 0.676990             |
| 1.678601    | 0.782065             |
| 1.703212    | 0.665314             |
| 1.727823    | 0.665217             |
| 1.752434    | 0.712132             |
| 1.777045    | 0.660082             |
| 1.801656    | 0.623077             |
| 1.826267    | 0.690449             |
| 1.850878    | 0.436108             |
| 1.875489    | 0.641924             |
| 1.900100    | 0.558038             |
| 1.924711    | 0.503145             |
| 1.949322    | 0.520210             |
| 1.973933    | 0.719535             |
| 1.998545    | 0.533140             |
| 2.023156    | 0.612718             |
| 2.047767    | 0.594376             |
| 2.072378    | 0.658158             |
| 2.096989    | 0.622276             |
| 2.121600    | 0.558819             |
| 2.146211    | 0.605246             |
| 2.170822    | 0.693398             |
| 2.195433    | 0.605870             |
| 2.220044    | 0.527155             |
| 2.244655    | 0.611564             |
| 2.269266    | 0.460494             |
| 2.293877    | 0.641967             |
| 2.318488    | 0.635703             |
| 2.343099    | 0.640133             |
| 2.367710    | 0.825259             |
| 2.392322    | 0.595017             |
| 2.416933    | 0.725555             |
| 2.441544    | 0.606385             |
| 2.466155    | 0.640796             |
| 2.490766    | 0.671225             |
| 2.515377    | 0.539457             |

Table 16: Total Reaction probability for  $v = 2$ ,  $j=3$  (CHIPR PES)

| Energy (eV) | Reaction Probability |
|-------------|----------------------|
| 0.025242    | 0.009233             |
| 0.049853    | 0.008848             |
| 0.074464    | 0.008009             |
| 0.099075    | 0.006578             |
| 0.123686    | 0.007220             |
| 0.148297    | 0.007028             |
| 0.172908    | 0.011520             |
| 0.197520    | 0.025062             |
| 0.222131    | 0.032619             |
| 0.246742    | 0.052906             |
| 0.271353    | 0.080911             |
| 0.295964    | 0.101255             |
| 0.320575    | 0.386521             |
| 0.345186    | 0.373086             |
| 0.369797    | 0.200271             |
| 0.394408    | 0.471287             |
| 0.419019    | 0.272357             |
| 0.443630    | 0.390648             |
| 0.468241    | 0.345432             |
| 0.492852    | 0.507984             |
| 0.517463    | 0.684833             |
| 0.542074    | 0.408824             |
| 0.566686    | 0.632233             |
| 0.591297    | 0.462418             |
| 0.615908    | 0.302612             |
| 0.640519    | 0.393893             |
| 0.665130    | 0.363871             |
| 0.689741    | 0.603073             |
| 0.714352    | 0.530048             |
| 0.738963    | 0.469032             |
| 0.763574    | 0.439304             |
| 0.788185    | 0.573802             |
| 0.812796    | 0.317421             |
| 0.837407    | 0.465857             |
| 0.862018    | 0.519222             |
| 0.886629    | 0.651103             |
| 0.911240    | 0.679857             |
| 0.935851    | 0.731849             |
| 0.960463    | 0.551841             |
| 0.985074    | 0.410934             |
| 1.009685    | 0.414420             |
| 1.034296    | 0.448359             |
| 1.058907    | 0.495356             |
| 1.083518    | 0.461402             |
| 1.108129    | 0.621101             |
| 1.132740    | 0.645010             |
| 1.157351    | 0.628893             |
| 1.181962    | 0.727452             |
| 1.206573    | 0.508578             |
| 1.231184    | 0.550647             |
| 1.255795    | 0.517323             |
| 1.280406    | 0.581256             |
| 1.305017    | 0.609616             |
| 1.329628    | 0.631775             |
| 1.354240    | 0.691525             |

Table 17: ... Continued from Previous Page

| Energy (eV) | Reaction Probability |
|-------------|----------------------|
| 1.378851    | 0.611887             |
| 1.403462    | 0.658162             |
| 1.428073    | 0.649928             |
| 1.452684    | 0.593725             |
| 1.477295    | 0.628095             |
| 1.501906    | 0.777667             |
| 1.526517    | 0.611575             |
| 1.551128    | 0.570343             |
| 1.575739    | 0.570168             |
| 1.600350    | 0.682957             |
| 1.624961    | 0.475972             |
| 1.649572    | 0.692354             |
| 1.674183    | 0.795418             |
| 1.698794    | 0.668967             |
| 1.723405    | 0.628616             |
| 1.748017    | 0.647990             |
| 1.772628    | 0.539296             |
| 1.797239    | 0.562995             |
| 1.821850    | 0.597282             |
| 1.846461    | 0.455389             |
| 1.871072    | 0.590309             |
| 1.895683    | 0.654551             |
| 1.920294    | 0.624601             |
| 1.944905    | 0.677475             |
| 1.969516    | 0.590548             |
| 1.994127    | 0.654150             |
| 2.018738    | 0.527716             |
| 2.043349    | 0.644694             |
| 2.067960    | 0.529752             |
| 2.092571    | 0.580663             |
| 2.117182    | 0.643981             |
| 2.141794    | 0.554271             |
| 2.166405    | 0.649776             |
| 2.191016    | 0.658598             |
| 2.215627    | 0.495337             |
| 2.240238    | 0.569081             |
| 2.264849    | 0.647837             |
| 2.289460    | 0.493395             |
| 2.314071    | 0.477695             |
| 2.338682    | 0.515288             |
| 2.363293    | 0.733014             |
| 2.387904    | 0.544314             |
| 2.412515    | 0.561313             |
| 2.437126    | 0.617869             |
| 2.461737    | 0.523461             |
| 2.486348    | 0.603458             |
| 2.510960    | 0.680351             |

Table 18: Total Reaction probability for  $v = 2$ ,  $j=5$  (CHIPR PES)

| Energy (eV) | Reaction Probability |
|-------------|----------------------|
| 0.025242    | 0.010149             |
| 0.049853    | 0.008521             |
| 0.074464    | 0.006721             |
| 0.099075    | 0.005063             |
| 0.123686    | 0.009172             |
| 0.148297    | 0.010176             |
| 0.172908    | 0.014179             |
| 0.197520    | 0.026947             |
| 0.222131    | 0.030413             |
| 0.246742    | 0.062718             |
| 0.271353    | 0.090802             |
| 0.295964    | 0.101278             |
| 0.320575    | 0.391891             |
| 0.345186    | 0.362493             |
| 0.369797    | 0.195582             |
| 0.394408    | 0.464038             |
| 0.419019    | 0.352204             |
| 0.443630    | 0.415671             |
| 0.468241    | 0.380829             |
| 0.492852    | 0.547422             |
| 0.517463    | 0.687495             |
| 0.542074    | 0.435713             |
| 0.566686    | 0.691288             |
| 0.591297    | 0.536357             |
| 0.615908    | 0.288888             |
| 0.640519    | 0.441404             |
| 0.665130    | 0.359757             |
| 0.689741    | 0.626093             |
| 0.714352    | 0.608960             |
| 0.738963    | 0.496971             |
| 0.763574    | 0.444226             |
| 0.788185    | 0.560545             |
| 0.812796    | 0.294848             |
| 0.837407    | 0.468448             |
| 0.862018    | 0.590250             |
| 0.886629    | 0.678466             |
| 0.911240    | 0.702579             |
| 0.935851    | 0.700958             |
| 0.960463    | 0.582382             |
| 0.985074    | 0.419408             |
| 1.009685    | 0.366604             |
| 1.034296    | 0.434920             |
| 1.058907    | 0.478077             |
| 1.083518    | 0.453434             |
| 1.108129    | 0.694531             |
| 1.132740    | 0.716525             |
| 1.157351    | 0.655052             |
| 1.181962    | 0.767480             |
| 1.206573    | 0.553914             |
| 1.231184    | 0.615615             |
| 1.255795    | 0.495264             |
| 1.280406    | 0.609428             |
| 1.305017    | 0.505647             |
| 1.329628    | 0.604736             |
| 1.354240    | 0.632166             |



Table 19: ... Continued from Previous Page

| Energy (eV) | Reaction Probability |
|-------------|----------------------|
| 1.378851    | 0.620322             |
| 1.403462    | 0.732539             |
| 1.428073    | 0.676556             |
| 1.452684    | 0.719167             |
| 1.477295    | 0.736316             |
| 1.501906    | 0.593416             |
| 1.526517    | 0.616160             |
| 1.551128    | 0.564249             |
| 1.575739    | 0.671964             |
| 1.600350    | 0.689298             |
| 1.624961    | 0.448890             |
| 1.649572    | 0.580291             |
| 1.674183    | 0.745454             |
| 1.698794    | 0.496408             |
| 1.723405    | 0.568330             |
| 1.748017    | 0.650513             |
| 1.772628    | 0.452168             |
| 1.797239    | 0.691235             |
| 1.821850    | 0.563718             |
| 1.846461    | 0.581173             |
| 1.871072    | 0.574445             |
| 1.895683    | 0.486694             |
| 1.920294    | 0.696322             |
| 1.944905    | 0.460601             |
| 1.969516    | 0.642714             |
| 1.994127    | 0.677196             |
| 2.018738    | 0.731010             |
| 2.043349    | 0.578568             |
| 2.067960    | 0.531503             |
| 2.092571    | 0.571256             |
| 2.117182    | 0.701989             |
| 2.141794    | 0.487686             |
| 2.166405    | 0.652356             |
| 2.191016    | 0.663116             |
| 2.215627    | 0.773383             |
| 2.240238    | 0.596970             |
| 2.264849    | 0.492990             |
| 2.289460    | 0.587937             |
| 2.314071    | 0.476344             |
| 2.338682    | 0.681099             |
| 2.363293    | 0.700509             |
| 2.387904    | 0.576844             |
| 2.412515    | 0.462050             |
| 2.437126    | 0.449745             |
| 2.461737    | 0.573897             |
| 2.486348    | 0.577746             |
| 2.510960    | 0.613779             |

Table 20: Total Reaction probability for  $v = 3, j=1$  (CHIPR PES)

| Energy (eV) | Reaction Probability |
|-------------|----------------------|
| 0.029659    | 0.000000             |
| 0.054271    | 0.000000             |
| 0.078882    | 0.000000             |
| 0.103493    | 0.016734             |
| 0.128104    | 0.042708             |
| 0.152715    | 0.056708             |
| 0.177326    | 0.045279             |
| 0.201937    | 0.083948             |
| 0.226548    | 0.140353             |
| 0.251159    | 0.146008             |
| 0.275770    | 0.503932             |
| 0.300381    | 0.439410             |
| 0.324992    | 0.272343             |
| 0.349603    | 0.397811             |
| 0.374214    | 0.482892             |
| 0.398825    | 0.404921             |
| 0.423436    | 0.400714             |
| 0.448048    | 0.494535             |
| 0.472659    | 0.294818             |
| 0.497270    | 0.438994             |
| 0.521881    | 0.677218             |
| 0.546492    | 0.370715             |
| 0.571103    | 0.650295             |
| 0.595714    | 0.350219             |
| 0.620325    | 0.297477             |
| 0.644936    | 0.486800             |
| 0.669547    | 0.342148             |
| 0.694158    | 0.523250             |
| 0.718769    | 0.628406             |
| 0.743380    | 0.526543             |
| 0.767991    | 0.410084             |
| 0.792602    | 0.517887             |
| 0.817214    | 0.217148             |
| 0.841825    | 0.467120             |
| 0.866436    | 0.583281             |
| 0.891047    | 0.478466             |
| 0.915658    | 0.781518             |
| 0.940269    | 0.722346             |
| 0.964880    | 0.507964             |
| 0.989491    | 0.430638             |
| 1.014102    | 0.415180             |
| 1.038713    | 0.505441             |
| 1.063324    | 0.525160             |
| 1.087935    | 0.536815             |
| 1.112546    | 0.635156             |
| 1.137157    | 0.583724             |
| 1.161768    | 0.666376             |
| 1.186379    | 0.440596             |
| 1.210991    | 0.683427             |
| 1.235602    | 0.533372             |
| 1.260213    | 0.448968             |
| 1.284824    | 0.604728             |
| 1.309435    | 0.583119             |
| 1.334046    | 0.582403             |
| 1.358657    | 0.695954             |
| 1.383268    | 0.456723             |

Table 21: ... Continued from Previous Page

| Energy (eV) | Reaction Probability |
|-------------|----------------------|
| 1.407879    | 0.475161             |
| 1.432490    | 0.624345             |
| 1.457101    | 0.545565             |
| 1.481712    | 0.559808             |
| 1.506323    | 0.655922             |
| 1.530934    | 0.425538             |
| 1.555545    | 0.543586             |
| 1.580156    | 0.502863             |
| 1.604768    | 0.498102             |
| 1.629379    | 0.421924             |
| 1.653990    | 0.588035             |
| 1.678601    | 0.495194             |
| 1.703212    | 0.493266             |
| 1.727823    | 0.454277             |
| 1.752434    | 0.623769             |
| 1.777045    | 0.597990             |
| 1.801656    | 0.543390             |
| 1.826267    | 0.600799             |
| 1.850878    | 0.671791             |
| 1.875489    | 0.551313             |
| 1.900100    | 0.664460             |
| 1.924711    | 0.577531             |
| 1.949322    | 0.596229             |
| 1.973933    | 0.523395             |
| 1.998545    | 0.567382             |
| 2.023156    | 0.634357             |
| 2.047767    | 0.510926             |
| 2.072378    | 0.518909             |
| 2.096989    | 0.586758             |
| 2.121600    | 0.538811             |
| 2.146211    | 0.603873             |
| 2.170822    | 0.571878             |
| 2.195433    | 0.663665             |
| 2.220044    | 0.732454             |
| 2.244655    | 0.566013             |
| 2.269266    | 0.512284             |
| 2.293877    | 0.545792             |
| 2.318488    | 0.630000             |
| 2.343099    | 0.490266             |
| 2.367710    | 0.529863             |
| 2.392322    | 0.594107             |
| 2.416933    | 0.566515             |
| 2.441544    | 0.670501             |
| 2.466155    | 0.493660             |
| 2.490766    | 0.436928             |
| 2.515377    | 0.612940             |

Table 22: Total Reaction probability for  $v = 3, j=3$  (CHIPR PES)

| Energy (eV) | Reaction Probability |
|-------------|----------------------|
| 0.025242    | 0.000000             |
| 0.049853    | 0.000000             |
| 0.074464    | 0.010061             |
| 0.099075    | 0.019465             |
| 0.123686    | 0.072820             |
| 0.148297    | 0.092663             |
| 0.172908    | 0.099413             |
| 0.197520    | 0.248046             |
| 0.222131    | 0.170458             |
| 0.246742    | 0.194396             |
| 0.271353    | 0.312815             |
| 0.295964    | 0.277960             |
| 0.320575    | 0.641914             |
| 0.345186    | 0.572253             |
| 0.369797    | 0.265249             |
| 0.394408    | 0.612335             |
| 0.419019    | 0.344865             |
| 0.443630    | 0.385226             |
| 0.468241    | 0.358717             |
| 0.492852    | 0.524263             |
| 0.517463    | 0.662305             |
| 0.542074    | 0.383661             |
| 0.566686    | 0.620412             |
| 0.591297    | 0.442332             |
| 0.615908    | 0.283946             |
| 0.640519    | 0.398397             |
| 0.665130    | 0.348345             |
| 0.689741    | 0.608035             |
| 0.714352    | 0.521023             |
| 0.738963    | 0.439167             |
| 0.763574    | 0.445895             |
| 0.788185    | 0.565894             |
| 0.812796    | 0.291980             |
| 0.837407    | 0.470169             |
| 0.862018    | 0.530896             |
| 0.886629    | 0.679478             |
| 0.911240    | 0.648384             |
| 0.935851    | 0.716387             |
| 0.960463    | 0.591576             |
| 0.985074    | 0.438778             |
| 1.009685    | 0.449054             |
| 1.034296    | 0.506955             |
| 1.058907    | 0.487699             |
| 1.083518    | 0.460952             |
| 1.108129    | 0.626563             |
| 1.132740    | 0.629116             |
| 1.157351    | 0.608488             |
| 1.181962    | 0.662909             |
| 1.206573    | 0.549740             |
| 1.231184    | 0.606391             |
| 1.255795    | 0.533432             |
| 1.280406    | 0.700331             |
| 1.305017    | 0.511881             |
| 1.329628    | 0.656217             |
| 1.354240    | 0.743006             |

Table 23: ... Continued from Previous Page

| Energy (eV) | Reaction Probability |
|-------------|----------------------|
| 1.378851    | 0.527494             |
| 1.403462    | 0.600740             |
| 1.428073    | 0.504389             |
| 1.452684    | 0.600292             |
| 1.477295    | 0.580282             |
| 1.501906    | 0.607027             |
| 1.526517    | 0.471103             |
| 1.551128    | 0.375623             |
| 1.575739    | 0.456684             |
| 1.600350    | 0.592295             |
| 1.624961    | 0.326355             |
| 1.649572    | 0.606038             |
| 1.674183    | 0.508906             |
| 1.698794    | 0.658058             |
| 1.723405    | 0.616868             |
| 1.748017    | 0.613271             |
| 1.772628    | 0.509496             |
| 1.797239    | 0.553627             |
| 1.821850    | 0.595623             |
| 1.846461    | 0.472297             |
| 1.871072    | 0.742538             |
| 1.895683    | 0.683721             |
| 1.920294    | 0.459594             |
| 1.944905    | 0.631928             |
| 1.969516    | 0.521427             |
| 1.994127    | 0.577412             |
| 2.018738    | 0.583730             |
| 2.043349    | 0.748410             |
| 2.067960    | 0.635507             |
| 2.092571    | 0.605663             |
| 2.117182    | 0.670222             |
| 2.141794    | 0.660874             |
| 2.166405    | 0.646011             |
| 2.191016    | 0.576654             |
| 2.215627    | 0.560105             |
| 2.240238    | 0.610423             |
| 2.264849    | 0.707760             |
| 2.289460    | 0.629617             |
| 2.314071    | 0.491617             |
| 2.338682    | 0.423853             |
| 2.363293    | 0.652824             |
| 2.387904    | 0.626896             |
| 2.412515    | 0.611007             |
| 2.437126    | 0.497248             |
| 2.461737    | 0.483922             |
| 2.486348    | 0.564898             |
| 2.510960    | 0.599143             |

Table 24: Total Reaction probability for  $v = 3$ ,  $j=5$  (CHIPR PES)

| Energy (eV) | Reaction Probability |
|-------------|----------------------|
| 0.025242    | 0.000000             |
| 0.049853    | 0.000000             |
| 0.074464    | 0.015904             |
| 0.099075    | 0.019432             |
| 0.123686    | 0.119641             |
| 0.148297    | 0.159210             |
| 0.172908    | 0.138300             |
| 0.197520    | 0.327981             |
| 0.222131    | 0.237139             |
| 0.246742    | 0.279042             |
| 0.271353    | 0.338175             |
| 0.295964    | 0.351585             |
| 0.320575    | 0.692757             |
| 0.345186    | 0.580865             |
| 0.369797    | 0.264168             |
| 0.394408    | 0.637870             |
| 0.419019    | 0.382510             |
| 0.443630    | 0.473573             |
| 0.468241    | 0.431389             |
| 0.492852    | 0.556413             |
| 0.517463    | 0.677832             |
| 0.542074    | 0.398822             |
| 0.566686    | 0.685301             |
| 0.591297    | 0.529094             |
| 0.615908    | 0.289022             |
| 0.640519    | 0.435276             |
| 0.665130    | 0.347672             |
| 0.689741    | 0.611275             |
| 0.714352    | 0.588327             |
| 0.738963    | 0.456979             |
| 0.763574    | 0.403790             |
| 0.788185    | 0.559621             |
| 0.812796    | 0.290519             |
| 0.837407    | 0.486770             |
| 0.862018    | 0.593513             |
| 0.886629    | 0.685557             |
| 0.911240    | 0.693683             |
| 0.935851    | 0.705648             |
| 0.960463    | 0.650219             |
| 0.985074    | 0.400888             |
| 1.009685    | 0.379601             |
| 1.034296    | 0.508147             |
| 1.058907    | 0.585957             |
| 1.083518    | 0.548664             |
| 1.108129    | 0.721930             |
| 1.132740    | 0.637926             |
| 1.157351    | 0.665922             |
| 1.181962    | 0.710476             |
| 1.206573    | 0.565489             |
| 1.231184    | 0.639437             |
| 1.255795    | 0.530168             |
| 1.280406    | 0.625679             |
| 1.305017    | 0.561040             |
| 1.329628    | 0.546717             |
| 1.354240    | 0.705061             |

Table 25: ... Continued from Previous Page

| Energy (eV) | Reaction Probability |
|-------------|----------------------|
| 1.378851    | 0.651722             |
| 1.403462    | 0.691872             |
| 1.428073    | 0.618460             |
| 1.452684    | 0.678911             |
| 1.477295    | 0.567022             |
| 1.501906    | 0.529378             |
| 1.526517    | 0.608440             |
| 1.551128    | 0.513464             |
| 1.575739    | 0.387099             |
| 1.600350    | 0.503282             |
| 1.624961    | 0.521865             |
| 1.649572    | 0.527904             |
| 1.674183    | 0.670877             |
| 1.698794    | 0.374661             |
| 1.723405    | 0.518460             |
| 1.748017    | 0.560239             |
| 1.772628    | 0.546253             |
| 1.797239    | 0.612355             |
| 1.821850    | 0.411558             |
| 1.846461    | 0.572072             |
| 1.871072    | 0.594115             |
| 1.895683    | 0.578978             |
| 1.920294    | 0.736031             |
| 1.944905    | 0.519420             |
| 1.969516    | 0.558548             |
| 1.994127    | 0.576437             |
| 2.018738    | 0.509836             |
| 2.043349    | 0.600902             |
| 2.067960    | 0.547429             |
| 2.092571    | 0.666762             |
| 2.117182    | 0.566533             |
| 2.141794    | 0.534702             |
| 2.166405    | 0.642688             |
| 2.191016    | 0.550307             |
| 2.215627    | 0.605035             |
| 2.240238    | 0.529061             |
| 2.264849    | 0.675002             |
| 2.289460    | 0.592231             |
| 2.314071    | 0.473698             |
| 2.338682    | 0.468148             |
| 2.363293    | 0.607127             |
| 2.387904    | 0.591607             |
| 2.412515    | 0.587496             |
| 2.437126    | 0.595958             |
| 2.461737    | 0.581310             |
| 2.486348    | 0.469747             |
| 2.510960    | 0.473563             |

Table 26: Total Reaction probability for  $v = 4$ ,  $j=1$  (CHIPR PES)

| Energy (eV) | Reaction Probability |
|-------------|----------------------|
| 0.029659    | 0.000000             |
| 0.054271    | 0.000000             |
| 0.078882    | 0.005277             |
| 0.103493    | 0.009817             |
| 0.128104    | 0.045507             |
| 0.152715    | 0.046083             |
| 0.177326    | 0.075483             |
| 0.201937    | 0.084770             |
| 0.226548    | 0.162317             |
| 0.251159    | 0.179280             |
| 0.275770    | 0.448243             |
| 0.300381    | 0.485137             |
| 0.324992    | 0.293822             |
| 0.349603    | 0.470691             |
| 0.374214    | 0.442278             |
| 0.398825    | 0.441951             |
| 0.423436    | 0.389662             |
| 0.448048    | 0.481018             |
| 0.472659    | 0.330553             |
| 0.497270    | 0.463112             |
| 0.521881    | 0.639319             |
| 0.546492    | 0.379775             |
| 0.571103    | 0.665601             |
| 0.595714    | 0.381172             |
| 0.620325    | 0.327431             |
| 0.644936    | 0.534445             |
| 0.669547    | 0.379654             |
| 0.694158    | 0.526602             |
| 0.718769    | 0.665943             |
| 0.743380    | 0.513774             |
| 0.767991    | 0.419327             |
| 0.792602    | 0.547655             |
| 0.817214    | 0.313560             |
| 0.841825    | 0.487395             |
| 0.866436    | 0.587191             |
| 0.891047    | 0.434323             |
| 0.915658    | 0.782190             |
| 0.940269    | 0.703752             |
| 0.964880    | 0.499310             |
| 0.989491    | 0.503087             |
| 1.014102    | 0.589410             |
| 1.038713    | 0.586464             |
| 1.063324    | 0.458381             |
| 1.087935    | 0.600592             |
| 1.112546    | 0.642511             |
| 1.137157    | 0.493662             |
| 1.161768    | 0.544657             |
| 1.186379    | 0.471465             |
| 1.210991    | 0.436089             |
| 1.235602    | 0.389547             |
| 1.260213    | 0.337614             |
| 1.284824    | 0.500884             |
| 1.309435    | 0.500764             |
| 1.334046    | 0.470240             |
| 1.358657    | 0.437492             |



Table 27: ... Continued from Previous Page

| Energy (eV) | Reaction Probability |
|-------------|----------------------|
| 1.383268    | 0.589582             |
| 1.407879    | 0.502684             |
| 1.432490    | 0.642816             |
| 1.457101    | 0.586724             |
| 1.481712    | 0.569025             |
| 1.506323    | 0.625766             |
| 1.530934    | 0.472676             |
| 1.555545    | 0.480907             |
| 1.580156    | 0.459857             |
| 1.604768    | 0.564993             |
| 1.629379    | 0.462186             |
| 1.653990    | 0.696395             |
| 1.678601    | 0.605938             |
| 1.703212    | 0.538794             |
| 1.727823    | 0.519305             |
| 1.752434    | 0.715317             |
| 1.777045    | 0.658510             |
| 1.801656    | 0.604744             |
| 1.826267    | 0.749064             |
| 1.850878    | 0.462626             |
| 1.875489    | 0.694573             |
| 1.900100    | 0.673934             |
| 1.924711    | 0.424982             |
| 1.949322    | 0.572464             |
| 1.973933    | 0.498244             |
| 1.998545    | 0.641238             |
| 2.023156    | 0.591600             |
| 2.047767    | 0.572420             |
| 2.072378    | 0.636846             |
| 2.096989    | 0.447230             |
| 2.121600    | 0.521868             |
| 2.146211    | 0.483259             |
| 2.170822    | 0.648193             |
| 2.195433    | 0.598142             |
| 2.220044    | 0.595299             |
| 2.244655    | 0.546795             |
| 2.269266    | 0.569691             |
| 2.293877    | 0.604426             |
| 2.318488    | 0.602414             |
| 2.343099    | 0.601298             |
| 2.367710    | 0.579865             |
| 2.392322    | 0.432171             |
| 2.416933    | 0.652623             |
| 2.441544    | 0.528005             |
| 2.466155    | 0.669645             |
| 2.490766    | 0.621323             |
| 2.515377    | 0.648774             |

Table 28: Total Reaction probability for  $v = 4$ ,  $j=3$  (CHIPR PES)

| Energy (eV) | Reaction Probability |
|-------------|----------------------|
| 0.025242    | 0.000000             |
| 0.049853    | 0.000000             |
| 0.074464    | 0.000000             |
| 0.099075    | 0.000000             |
| 0.123686    | 0.165989             |
| 0.148297    | 0.151195             |
| 0.172908    | 0.208426             |
| 0.197520    | 0.285752             |
| 0.222131    | 0.205559             |
| 0.246742    | 0.227782             |
| 0.271353    | 0.272404             |
| 0.295964    | 0.334433             |
| 0.320575    | 0.613171             |
| 0.345186    | 0.627671             |
| 0.369797    | 0.239258             |
| 0.394408    | 0.607156             |
| 0.419019    | 0.391079             |
| 0.443630    | 0.370688             |
| 0.468241    | 0.391076             |
| 0.492852    | 0.511397             |
| 0.517463    | 0.644811             |
| 0.542074    | 0.376770             |
| 0.566686    | 0.603110             |
| 0.591297    | 0.437030             |
| 0.615908    | 0.292995             |
| 0.640519    | 0.414160             |
| 0.665130    | 0.369930             |
| 0.689741    | 0.625069             |
| 0.714352    | 0.544261             |
| 0.738963    | 0.456183             |
| 0.763574    | 0.484419             |
| 0.788185    | 0.621525             |
| 0.812796    | 0.337007             |
| 0.837407    | 0.513186             |
| 0.862018    | 0.556523             |
| 0.886629    | 0.692503             |
| 0.911240    | 0.663759             |
| 0.935851    | 0.749151             |
| 0.960463    | 0.658943             |
| 0.985074    | 0.530617             |
| 1.009685    | 0.521257             |
| 1.034296    | 0.652859             |
| 1.058907    | 0.524101             |
| 1.083518    | 0.590104             |
| 1.108129    | 0.604056             |
| 1.132740    | 0.514008             |
| 1.157351    | 0.552964             |
| 1.181962    | 0.492726             |
| 1.206573    | 0.467739             |
| 1.231184    | 0.441555             |
| 1.255795    | 0.341468             |
| 1.280406    | 0.415231             |
| 1.305017    | 0.422005             |
| 1.329628    | 0.471792             |
| 1.354240    | 0.496356             |

Table 29: ... Continued from Previous Page

| Energy (eV) | Reaction Probability |
|-------------|----------------------|
| 1.378851    | 0.496313             |
| 1.403462    | 0.581766             |
| 1.428073    | 0.509346             |
| 1.452684    | 0.485608             |
| 1.477295    | 0.458025             |
| 1.501906    | 0.629325             |
| 1.526517    | 0.493875             |
| 1.551128    | 0.499682             |
| 1.575739    | 0.550771             |
| 1.600350    | 0.593300             |
| 1.624961    | 0.463518             |
| 1.649572    | 0.623157             |
| 1.674183    | 0.639858             |
| 1.698794    | 0.542931             |
| 1.723405    | 0.644757             |
| 1.748017    | 0.688571             |
| 1.772628    | 0.558576             |
| 1.797239    | 0.473290             |
| 1.821850    | 0.554571             |
| 1.846461    | 0.449958             |
| 1.871072    | 0.766493             |
| 1.895683    | 0.588305             |
| 1.920294    | 0.565998             |
| 1.944905    | 0.656461             |
| 1.969516    | 0.561574             |
| 1.994127    | 0.468449             |
| 2.018738    | 0.501674             |
| 2.043349    | 0.539117             |
| 2.067960    | 0.612144             |
| 2.092571    | 0.548518             |
| 2.117182    | 0.597755             |
| 2.141794    | 0.589993             |
| 2.166405    | 0.639779             |
| 2.191016    | 0.484710             |
| 2.215627    | 0.540604             |
| 2.240238    | 0.545350             |
| 2.264849    | 0.504641             |
| 2.289460    | 0.533318             |
| 2.314071    | 0.405460             |
| 2.338682    | 0.506963             |
| 2.363293    | 0.719229             |
| 2.387904    | 0.617698             |
| 2.412515    | 0.589799             |
| 2.437126    | 0.597853             |
| 2.461737    | 0.479043             |
| 2.486348    | 0.607014             |
| 2.510960    | 0.532313             |

Table 30: Total Reaction probability for  $v = 4$ ,  $j=5$  (CHIPR PES)

| Energy (eV) | Reaction Probability |
|-------------|----------------------|
| 0.025242    | 0.000000             |
| 0.049853    | 0.000000             |
| 0.074464    | 0.014843             |
| 0.099075    | 0.041552             |
| 0.123686    | 0.188140             |
| 0.148297    | 0.162011             |
| 0.172908    | 0.186240             |
| 0.197520    | 0.299356             |
| 0.222131    | 0.281521             |
| 0.246742    | 0.287231             |
| 0.271353    | 0.319337             |
| 0.295964    | 0.432967             |
| 0.320575    | 0.667008             |
| 0.345186    | 0.648692             |
| 0.369797    | 0.261747             |
| 0.394408    | 0.642526             |
| 0.419019    | 0.400010             |
| 0.443630    | 0.460587             |
| 0.468241    | 0.453018             |
| 0.492852    | 0.564021             |
| 0.517463    | 0.678509             |
| 0.542074    | 0.399836             |
| 0.566686    | 0.686574             |
| 0.591297    | 0.527150             |
| 0.615908    | 0.312238             |
| 0.640519    | 0.455605             |
| 0.665130    | 0.393227             |
| 0.689741    | 0.618615             |
| 0.714352    | 0.623430             |
| 0.738963    | 0.434491             |
| 0.763574    | 0.427084             |
| 0.788185    | 0.583986             |
| 0.812796    | 0.328465             |
| 0.837407    | 0.568000             |
| 0.862018    | 0.642576             |
| 0.886629    | 0.731123             |
| 0.911240    | 0.702920             |
| 0.935851    | 0.704662             |
| 0.960463    | 0.735127             |
| 0.985074    | 0.456433             |
| 1.009685    | 0.436316             |
| 1.034296    | 0.673492             |
| 1.058907    | 0.686357             |
| 1.083518    | 0.690169             |
| 1.108129    | 0.749566             |
| 1.132740    | 0.572071             |
| 1.157351    | 0.681665             |
| 1.181962    | 0.458537             |
| 1.206573    | 0.555009             |
| 1.231184    | 0.601860             |
| 1.255795    | 0.502840             |
| 1.280406    | 0.636383             |
| 1.305017    | 0.535597             |
| 1.329628    | 0.570966             |
| 1.354240    | 0.516405             |

Table 31: ... Continued from Previous Page

| Energy (eV) | Reaction Probability |
|-------------|----------------------|
| 1.378851    | 0.581958             |
| 1.403462    | 0.747457             |
| 1.428073    | 0.669560             |
| 1.452684    | 0.488207             |
| 1.477295    | 0.498752             |
| 1.501906    | 0.684491             |
| 1.526517    | 0.457618             |
| 1.551128    | 0.532921             |
| 1.575739    | 0.456683             |
| 1.600350    | 0.514612             |
| 1.624961    | 0.473065             |
| 1.649572    | 0.652532             |
| 1.674183    | 0.739556             |
| 1.698794    | 0.709792             |
| 1.723405    | 0.504727             |
| 1.748017    | 0.686166             |
| 1.772628    | 0.597831             |
| 1.797239    | 0.546947             |
| 1.821850    | 0.682769             |
| 1.846461    | 0.678054             |
| 1.871072    | 0.614177             |
| 1.895683    | 0.514882             |
| 1.920294    | 0.514413             |
| 1.944905    | 0.645303             |
| 1.969516    | 0.568576             |
| 1.994127    | 0.615619             |
| 2.018738    | 0.410239             |
| 2.043349    | 0.406997             |
| 2.067960    | 0.715163             |
| 2.092571    | 0.663220             |
| 2.117182    | 0.558815             |
| 2.141794    | 0.635245             |
| 2.166405    | 0.654151             |
| 2.191016    | 0.562704             |
| 2.215627    | 0.390961             |
| 2.240238    | 0.510773             |
| 2.264849    | 0.493200             |
| 2.289460    | 0.606100             |
| 2.314071    | 0.390019             |
| 2.338682    | 0.453014             |
| 2.363293    | 0.599733             |
| 2.387904    | 0.509592             |
| 2.412515    | 0.582272             |
| 2.437126    | 0.490806             |
| 2.461737    | 0.551810             |
| 2.486348    | 0.613805             |
| 2.510960    | 0.458374             |

Table 32: Total Reaction probability for  $v = 0, j=1$  (DMBE IV PES)

| Energy (eV) | Reaction Probability |
|-------------|----------------------|
| 0.671381    | 0.005886             |
| 0.691574    | 0.011710             |
| 0.711768    | 0.016678             |
| 0.731962    | 0.010497             |
| 0.752156    | 0.017753             |
| 0.772349    | 0.039393             |
| 0.792543    | 0.015352             |
| 0.812737    | 0.045988             |
| 0.832930    | 0.023505             |
| 0.853124    | 0.028745             |
| 0.873318    | 0.037969             |
| 0.893511    | 0.068876             |
| 0.913705    | 0.023260             |
| 0.933899    | 0.130503             |
| 0.954092    | 0.056154             |
| 0.974286    | 0.051652             |
| 0.994480    | 0.133247             |
| 1.014674    | 0.108026             |
| 1.034867    | 0.118612             |
| 1.055061    | 0.184888             |
| 1.075255    | 0.220180             |
| 1.095448    | 0.232943             |
| 1.115642    | 0.212161             |
| 1.135836    | 0.178799             |
| 1.156029    | 0.317986             |
| 1.176223    | 0.107199             |
| 1.196417    | 0.133465             |
| 1.216610    | 0.288854             |
| 1.236804    | 0.337072             |
| 1.256998    | 0.279702             |
| 1.277192    | 0.285435             |
| 1.297385    | 0.397646             |
| 1.317579    | 0.202168             |
| 1.337773    | 0.290201             |
| 1.357966    | 0.302402             |
| 1.378160    | 0.307027             |
| 1.398354    | 0.295962             |
| 1.418547    | 0.202370             |
| 1.438741    | 0.303247             |
| 1.458935    | 0.266750             |
| 1.479128    | 0.443629             |
| 1.499322    | 0.533839             |
| 1.519516    | 0.415502             |

Table 33: ... Continued from Previous Page

| Energy (eV) | Reaction Probability |
|-------------|----------------------|
| 1.539710    | 0.264631             |
| 1.559903    | 0.369040             |
| 1.580097    | 0.417063             |
| 1.600291    | 0.497435             |
| 1.620484    | 0.597264             |
| 1.640678    | 0.474676             |
| 1.660872    | 0.494467             |
| 1.681065    | 0.493433             |
| 1.701259    | 0.267761             |
| 1.721453    | 0.398170             |
| 1.741646    | 0.473990             |
| 1.761840    | 0.322487             |
| 1.782034    | 0.430520             |
| 1.802228    | 0.337693             |
| 1.822421    | 0.505640             |
| 1.842615    | 0.336434             |
| 1.862809    | 0.307861             |
| 1.883002    | 0.335967             |
| 1.903196    | 0.384101             |
| 1.923390    | 0.244238             |
| 1.943583    | 0.358137             |
| 1.963777    | 0.421987             |
| 1.983971    | 0.319937             |
| 2.004164    | 0.375250             |
| 2.024358    | 0.324583             |
| 2.044552    | 0.300246             |
| 2.064746    | 0.313858             |
| 2.084939    | 0.336483             |
| 2.105133    | 0.307592             |
| 2.125327    | 0.341064             |
| 2.145520    | 0.391199             |
| 2.165714    | 0.262278             |
| 2.185908    | 0.352288             |
| 2.206101    | 0.317520             |
| 2.226295    | 0.399392             |
| 2.246489    | 0.476546             |
| 2.266682    | 0.417061             |
| 2.286876    | 0.308690             |
| 2.307070    | 0.266337             |
| 2.327264    | 0.274649             |
| 2.347457    | 0.269510             |
| 2.367651    | 0.290360             |
| 2.387845    | 0.349763             |
| 2.408038    | 0.223641             |
| 2.428232    | 0.243753             |
| 2.448426    | 0.360958             |
| 2.468619    | 0.284062             |
| 2.488813    | 0.320387             |
| 2.509007    | 0.232940             |
